# Supplementary material
Source: publisher figshare collection journal article supplement (https://rs.figshare.com/ndownloader/files/11094788)
Supplement: Supplementary file [file 11094788]

## Supplementary Material

### Supplementary Results

**Table S1.**

| Degrees of rotational freedom      | Maximum cross correlation coefficient (median $\pm$ 95% CI) | Wilcoxon-signed rank (V) | p-value |
|------------------------------------|-------------------------------------------------------------|--------------------------|---------|
| yaw-torsion ( <i>left eye</i> )    | 0.01 $\pm$ 0.20                                             | 95                       | 0.381   |
| yaw-torsion ( <i>right eye</i> )   | 0.04 $\pm$ 0.21                                             | 117                      | 0.055   |
| yaw-pitch ( <i>left eye</i> )      | -0.01 $\pm$ 0.14                                            | 66                       | 0.619   |
| yaw-pitch ( <i>right eye</i> )     | 0.02 $\pm$ 0.13                                             | 95                       | 0.381   |
| torsion-pitch ( <i>left eye</i> )  | 0.00 $\pm$ 0.17                                             | 84                       | 0.723   |
| torsion-pitch ( <i>right eye</i> ) | 0.00 $\pm$ 0.13                                             | 82                       | 0.795   |

**Table S1:** The median ( $\pm$  95% confidence interval (CI)) maximum cross correlation coefficient between each of the three degrees of rotational degrees of freedom for the left and right eyes and the results of a Wilcoxon sign-ranked test with a median of 0 ( $n=17$ ).
